# Supplementary material for: Study protocol: a clinical trial for improving mental health screening for Aboriginal and Torres Strait Islander pregnant women and mothers of young children using the Kimberley Mum's Mood Scale
Source: Springer Nature journal article supplement (doi:10.1186/s12889-019-7845-3), 2019-11-14
Supplement: MOESM3 [file 17388544]

# Kimberley Mum's Mood Scale Scoring Template

NAME: \_\_\_\_\_  
 DOB: \_\_\_\_\_  
 DATE: \_\_\_\_\_

**Part 1 Instructions:** Add up to determine total Part 1 score.  
 Any score > 0 in Question 10 requires further exploration.

|                                                                                                                                                                                                                                                                                                                                                                                                                                                                                                                         |                  |                     |                   |                | SCORE |
|-------------------------------------------------------------------------------------------------------------------------------------------------------------------------------------------------------------------------------------------------------------------------------------------------------------------------------------------------------------------------------------------------------------------------------------------------------------------------------------------------------------------------|------------------|---------------------|-------------------|----------------|-------|
| 1. I can sit down and have a good laugh                                                                                                                                                                                                                                                                                                                                                                                                                                                                                 | Yes, always<br>0 | Yes, sometimes<br>1 | No, not much<br>2 | No, never<br>3 |       |
| 2. I look forward for good things to happen                                                                                                                                                                                                                                                                                                                                                                                                                                                                             | Yes, always<br>0 | Yes, sometimes<br>1 | No, not much<br>2 | No, never<br>3 |       |
| 3. I blame myself when things go wrong                                                                                                                                                                                                                                                                                                                                                                                                                                                                                  | Yes, always<br>3 | Yes, sometimes<br>2 | No, not much<br>1 | No, never<br>0 |       |
| 4. I worry too much and don't know why                                                                                                                                                                                                                                                                                                                                                                                                                                                                                  | Yes, always<br>3 | Yes, sometimes<br>2 | No, not much<br>1 | No, never<br>0 |       |
| 5. I feel frightened and shaky a lot                                                                                                                                                                                                                                                                                                                                                                                                                                                                                    | Yes, always<br>3 | Yes, sometimes<br>2 | No, not much<br>1 | No, never<br>0 |       |
| 6. I can't handle all the stress or I stress out                                                                                                                                                                                                                                                                                                                                                                                                                                                                        | Yes, always<br>3 | Yes, sometimes<br>2 | No, not much<br>1 | No, never<br>0 |       |
| 7. I feel really no good, like no-one loves me                                                                                                                                                                                                                                                                                                                                                                                                                                                                          | Yes, always<br>3 | Yes, sometimes<br>2 | No, not much<br>1 | No, never<br>0 |       |
| 8. I can't sleep because I am sad or think too much                                                                                                                                                                                                                                                                                                                                                                                                                                                                     | Yes, always<br>3 | Yes, sometimes<br>2 | No, not much<br>1 | No, never<br>0 |       |
| 9. I am so sad I have been crying                                                                                                                                                                                                                                                                                                                                                                                                                                                                                       | Yes, always<br>3 | Yes, sometimes<br>2 | No, not much<br>1 | No, never<br>0 |       |
| 10. I think about doing something bad to myself or others                                                                                                                                                                                                                                                                                                                                                                                                                                                               | Yes, always<br>3 | Yes, sometimes<br>2 | No, not much<br>1 | No, never<br>0 |       |
| <p>For any response other than "No, never", ask exploring questions. E.g. Who do you think about doing something bad to? Can you tell me more about these feelings and thoughts you are having? When did you have these thoughts? Do you have a plan? What keeps you safe? Comments:</p> <p>_____</p> <p>_____</p> <p>_____</p> <p><input type="checkbox"/> Immediate concerns: Follow Kimberley Self-Harm / Suicide Protocol.</p> <p><input type="checkbox"/> If no immediate concerns, continue with KMMS Part 2.</p> |                  |                     |                   |                |       |

**TOTAL PART 1 SCORE**
