# Supplementary material for: Study protocol: a clinical trial for improving mental health screening for Aboriginal and Torres Strait Islander pregnant women and mothers of young children using the Kimberley Mum's Mood Scale
Source: Springer Nature journal article supplement (doi:10.1186/s12889-019-7845-3), 2019-11-14
Supplement: MOESM4 [file 17388544]

# KMMS Diagnosis and Management Tool

Date: .....

EMR Number: .....

Name of Clinician: .....

MMEX

CHIS

Communicare

Study Site: .....

Other .....

## MENTAL STATE EXAMINATION

|                                                            |                    |
|------------------------------------------------------------|--------------------|
| General appearance behaviour                               | Perception         |
| Speech                                                     | Cognition          |
| Thought: Stream, form, content                             | Memory             |
| Appetite                                                   | Motivation/Energy  |
| Anxiety                                                    | Sleep              |
| Mental health family history                               | Social history     |
| Abuse History: Substance, sexual/ physical (self or other) | Protective factors |

## AT LEAST ONE OF THE FOLLOWING

Depressed mood

Loss of interest or pleasure

## 5 OR MORE [including at least 1 from above present in the same 2 week period]

Sleep disturbances

Psycho-motor agitation or delay

Weight loss or gain

Loss of energy

Difficulty concentrating

Recurrent thoughts of death, suicide, harming others

Worthless guilty

Appetite loss

## GENERALIZED ANXIETY DISORDER (GAD):

Excessive anxiety or worry

Difficulty concentrating

Restlessness, on edge

Irritability

Easily fatigued

Muscle tension

Sleep disturbance

## POST TRAUMATIC STRESS DISORDER

### PAST EXPOSURE - Both must be present

Exposure to violence, abuse, trauma  Responses involved fear, helplessness or horror

### RECURRENCE OF

Flashbacks  Avoidance of stimuli

Nightmares  Numbed emotional responses

Psychological distress  Autonomic hyperarousal (outbursts, hypervigilance, startle, panic symptoms)

### DIAGNOSIS USING DSM IV CRITERIA

#### MILD

#### MODERATE

#### SEVERE

Depression Yes  No

Anxiety Yes  No

GAD Yes  No

PTSD Yes  No

### SAFETY [If any 'Yes' answers must follow up with plan]

Increased irritability/anger (getting wild with others) Yes  Arousal / agitation / aggression Yes

Increased harmful actions (lashing out at others) Yes  Dysregulated mood Yes

Inadvertent harm to others (e.g. dependants, unborn child) Yes  Substance use – ETOH or other drugs Yes

Inadvertent harm to self (e.g. neglect) Yes

Immediate

Short term

Long term

No apparent risk

Current level of risk of self harm

Current level of risk of suicide

Current level of risk to others

### PROTECTIVE FACTORS

Currently weak, inaccessible  Currently moderate, limited availability  Currently strong, very accessible

### MANAGEMENT PLAN

#### IMMEDIATE

#### SHORT TERM

#### LONG TERM

Documented in Clinical Records Yes
